# Supplementary material
Source: publisher figshare collection journal article supplement (https://geolsoc.figshare.com/ndownloader/files/22775648)
Supplement: Supplementary file 1 [file 22775648]

## Sheet: PlotDat15
Source sheet	Sheet1	289.165	0.0821927	60	0.0481483	321.821	0.0464299	7.75852	0.0093735	321.818	0.0427642
Plot name	Concordia12	285.084	0.0916888	60.2164	0.0481404	257.357	0.0465267	4.68937	0.0065902	321.824	0.0500955
Plot Type	1	274.981	0.115244	61.5668	0.0480934	214.381	0.0466238	6.4529	0.0109837	214.375	0.0429581
1st free col	13	291.747	0.0703505	62.9786	0.0480464	183.684	0.0467212	8.27421	0.00844555	214.387	0.0502895
Sigma Level	1	293.841	0.0615018	64.4561	0.0479995	160.661	0.0468189	6.41979	0.00668702	160.65	0.0431532
Absolute Errs	TRUE	288.785	0.0729891	66.004	0.0479527	142.754	0.0469169	7.32413	0.00857904	160.672	0.0504846
Symbol Type	2	277.836	0.0929239	67.6275	0.0479059	128.429	0.0470152	9.00435	0.00933163	128.411	0.0433496
Inverse Plot	TRUE	277.8	0.0907464	69.3322	0.0478592	116.708	0.0471138	8.79608	0.0147063	128.446	0.0506808
Color Plot	TRUE	262.186	0.13119	71.1245	0.0478126	106.941	0.0472127	12.087	0.0302904	106.916	0.0435472
3D plot	FALSE	277.773	0.0831144	73.0112	0.047766	98.6764	0.0473119	8.42837	0.0112686	106.966	0.0508783
Linear	FALSE	282.533	0.0692119	75	0.0477195	91.5925	0.0474114	7.96294	0.010159	91.5578	0.043746
Data Range	AM44:AP91	283.562	0.0636234	77.0994	0.047673	85.4532	0.0475112	8.6057	0.0112613	91.6273	0.0510768
Filled Symbols	TRUE	282.36	0.0653952	79.3189	0.0476267	80.0812	0.0476113	6.00689	0.00801845	80.0356	0.0439461
ConcAge	FALSE	281.948	0.0636764	81.6691	0.0475803	75.3413	0.0477117	6.25372	0.00650387	80.1269	0.0512765
ConcSwap	FALSE	271.556	0.0917956	84.1619	0.0475341	IsoLine	IsoLine	5.88967	0.00883427	IsoLine	IsoLine
1st Symbol-row	1	275.935	0.0780181	86.8107	0.0474879			7.38235	0.00935009
		283.206	0.0567751	89.6306	0.0474418			5.99668	0.00509181
		276.181	0.0759084	92.6387	0.0473958			10.3475	0.0128937
		277.037	0.071689	95.8546	0.0473498			6.31499	0.0095019
		257.161	0.125743	99.3005	0.0473038			11.7034	0.0290916
		266.929	0.0969955	103.002	0.047258			8.69138	0.00899291
		272.195	0.0799293	106.989	0.0472122			10.8179	0.0149663
		273.134	0.0733648	111.295	0.0471665			5.77177	0.00725259
		271.248	0.0779521	115.96	0.0471208			8.2876	0.0100504
		280.488	0.0516236	121.032	0.0470752			3.5496	0.00337266
		260.335	0.106224	126.566	0.0470297			12.1268	0.0226589
		276.461	0.0586455	132.628	0.0469842			5.10449	0.00595213
		274.562	0.0628705	139.297	0.0469388			5.88194	0.00697639
		277.387	0.0527673	146.669	0.0468934			3.73562	0.00342999
		239.75	0.159855	154.863	0.0468481			6.14395	0.0121745
		264.932	0.085214	164.022	0.0468029			5.98695	0.00907631
		269.571	0.0717987	174.33	0.0467578			8.39898	0.0117444
		278.623	0.0455353	186.015	0.0467127			5.98486	0.0058766
		274.853	0.0555973	199.374	0.0466676			3.51025	0.00327931
		270.584	0.067913	214.794	0.0466227			6.43117	0.0094342
		277.641	0.0457617	232.793	0.0465778			3.43432	0.00342205
		275.373	0.0505044	254.075	0.0465329			5.57023	0.00498471
		263.296	0.0846533	279.63	0.0464881			9.11488	0.0126869
		257.278	0.102089	310.889	0.0464434			10.9805	0.0219512
		224.616	0.19227	350	0.0463988			8.44135	0.0220168
		113.897	0.225209	350	0.0463988			7.78793	0.0388543
		140.591	0.0620753	IsoLine	IsoLine			10.4289	0.0413813
		126.236	0.0989464					7.14707	0.0387061
		130.747	0.0682079					9.87738	0.0377075
		127.713	0.0744826					7.80757	0.0371643
		130.201	0.050895					12.3425	0.0464733
		118.101	0.110946					10.9222	0.0513044
		88.8593	0.0609886					8.51334	0.150348
		IsoLine	IsoLine					IsoLine	IsoLine	IsoLine

## Sheet: PlotDat18
Source sheet	Sheet1	189.145	0.0929347	40	0.049238	321.821	0.0464299	8.55173	0.0245887	160.656	0.0431532
Plot name	Concordia15	183.431	0.0927801	40	0.049238	214.381	0.0466238	11.4674	0.0337489	160.666	0.0504846
Plot Type	1	181.378	0.0644287	41.1956	0.0491421	160.661	0.0468189	4.15339	0.00810197	106.929	0.0435471
1st free col	13	148.472	0.181929	42.4638	0.0490464	128.429	0.0470152	8.91338	0.0401908	106.953	0.0508783
Sigma Level	1	150.879	0.0896021	43.8117	0.048951	106.941	0.0472127	4.5526	0.0108681	80.0595	0.0439459
Absolute Errs	TRUE	48.7737	0.0781283	45.2469	0.0488559	91.5925	0.0474114	2.29034	0.0266482	80.1029	0.0512768
Symbol Type	2	IsoLine	IsoLine	46.7782	0.048761	80.0812	0.0476113	IsoLine	IsoLine	63.9311	0.0443497
Inverse Plot	TRUE			48.4156	0.0486664	71.128	0.0478125			63.9998	0.05168
Color Plot	TRUE			50.1705	0.0485721	63.9654	0.0480148			53.1716	0.0447588
3D plot	FALSE			52.056	0.048478	58.1052	0.0482184			53.2717	0.0520878
Linear	FALSE			54.0873	0.0483842	53.2217	0.0484233			45.4787	0.0451732
Data Range	AM99:AP104			56.2819	0.0482906	49.0895	0.0486294			45.6166	0.0525002
Filled Symbols	TRUE			58.6603	0.0481974	45.5476	0.0488367			IsoLine	IsoLine
ConcAge	FALSE			61.2468	0.0481043	42.478	0.0490454
ConcSwap	FALSE			64.0697	0.0480116	IsoLine	IsoLine
1st Symbol-row	1			67.1632	0.047919
				70.568	0.0478268
				74.3336	0.0477348
				78.5207	0.047643
				83.204	0.0475515
				88.4776	0.0474603
				94.4603	0.0473693
				101.306	0.0472786
				109.214	0.0471881
				118.456	0.0470979
				129.397	0.0470079
				142.555	0.0469181
				158.678	0.0468287
				178.899	0.0467394
				205.004	0.0466504
				240	0.0465617
				240	0.0465617
				IsoLine	IsoLine

## Sheet: PlotDat22
Source sheet	Sheet1	274.175	0.0572593	230	0.0465843	306.472	0.0464492	6.98199	0.00846775	292.518	0.0459187
Plot name	Concordia19	272.138	0.0525936	230	0.0465843	299.333	0.0464589	7.39398	0.0072258	292.52	0.0470184
Plot Type	1	265.32	0.0498782	231.867	0.0465799	292.519	0.0464685	4.08839	0.00452494	279.778	0.0459381
1st free col	13	263.683	0.0511984	233.763	0.0465755	286.008	0.0464782	5.82077	0.00691466	279.781	0.0470378
Sigma Level	1	264.546	0.0452902	235.692	0.0465712	279.779	0.0464879	6.05253	0.00655475	268.099	0.0459574
Absolute Errs	TRUE	260.15	0.0501326	237.652	0.0465668	273.816	0.0464976	5.14005	0.0056405	268.102	0.0470571
Symbol Type	2	258.41	0.0535381	239.645	0.0465625	268.101	0.0465073	6.93044	0.00790287	257.355	0.0459768
Inverse Plot	TRUE	259.739	0.0456389	241.672	0.0465581	262.619	0.046517	6.24913	0.00778729	257.359	0.0470765
Color Plot	TRUE	256.21	0.0504101	243.733	0.0465537	257.357	0.0465267	5.19765	0.00613145	247.438	0.0459962
3D plot	FALSE	IsoLine	IsoLine	245.829	0.0465494	252.301	0.0465364	IsoLine	IsoLine	247.441	0.0470959
Linear	FALSE			247.962	0.046545	247.439	0.0465461			238.254	0.0460156
Data Range	AM117:AP125			250.132	0.0465407	242.761	0.0465558			238.258	0.0471153
Filled Symbols	TRUE			252.341	0.0465363	238.256	0.0465655			IsoLine	IsoLine
ConcAge	FALSE			254.588	0.0465319	233.915	0.0465752
ConcSwap	FALSE			256.876	0.0465276	IsoLine	IsoLine
1st Symbol-row	1			259.205	0.0465232
				261.577	0.0465189
				263.993	0.0465145
				266.454	0.0465102
				268.96	0.0465058
				271.515	0.0465015
				274.118	0.0464971
				276.771	0.0464927
				279.477	0.0464884
				282.235	0.046484
				285.049	0.0464797
				287.919	0.0464753
				290.847	0.046471
				293.835	0.0464666
				296.886	0.0464623
				300	0.0464579
				300	0.0464579
				IsoLine	IsoLine

## Sheet: PlotDat23
Source sheet	Sheet1	88.096	0.124888	60	0.0481481	106.941	0.0472127	2.78029	0.016113	91.5912	0.0455786
Plot name	Concordia20	87.6073	0.0545186	60	0.0481481	98.6764	0.0473119	1.36076	0.00289261	91.5939	0.0492443
Plot Type	1	78.0018	0.0818146	60.8419	0.0481184	91.5925	0.0474114	2.31019	0.0118806	80.0795	0.0457785
1st free col	13	76.5214	0.0897838	61.7075	0.0480886	85.4532	0.0475112	1.953	0.00944819	80.083	0.0494442
Sigma Level	1	76.0468	0.0803119	62.5979	0.0480589	80.0812	0.0476113	1.14252	0.0065122	71.1258	0.0459797
Absolute Errs	TRUE	75.8883	0.0815555	63.5142	0.0480291	75.3413	0.0477117	2.06247	0.00777593	71.1302	0.0496453
Symbol Type	2	76.7963	0.0563542	64.4575	0.0479995	71.128	0.0478125	1.43759	0.00457985	63.9627	0.046182
Inverse Plot	TRUE	74.1999	0.0808415	65.4289	0.0479698	67.3582	0.0479135	0.97886	0.00388098	63.9682	0.0498476
Color Plot	TRUE	74.9005	0.0677122	66.4299	0.0479402	63.9654	0.0480148	1.86226	0.00845371	IsoLine	IsoLine
3D plot	FALSE	75.7786	0.0494278	67.4618	0.0479106	60.8958	0.0481165	2.18632	0.010316
Linear	FALSE	73.3106	0.0602953	68.526	0.047881	IsoLine	IsoLine	2.14723	0.0114904
Data Range	AM129:AP140	72.3219	0.0578916	69.624	0.0478514			0.954571	0.00505869
Filled Symbols	TRUE	IsoLine	IsoLine	70.7576	0.0478219			IsoLine	IsoLine	IsoLine
ConcAge	FALSE			71.9283	0.0477924
ConcSwap	FALSE			73.1382	0.0477629
1st Symbol-row	1			74.3893	0.0477335
				75.6835	0.0477041
				77.0233	0.0476747
				78.4111	0.0476453
				79.8494	0.047616
				81.3412	0.0475866
				82.8894	0.0475574
				84.4973	0.0475281
				86.1684	0.0474989
				87.9066	0.0474696
				89.7159	0.0474405
				91.6008	0.0474113
				93.5662	0.0473822
				95.6173	0.0473531
				97.7598	0.047324
				100	0.0472949
				100	0.0472949
				IsoLine	IsoLine

## Sheet: Sheet1
VDE 1	Long	166.48743
	Lat (S)	22.23675
analysis number	comments	206Pb/238U age (207corr.)	+/-1s	206Pb/238U	%rsd	208Pb/232Th	%rsd	207Pb/206Pb	%rsd	Hf	Pb	Th	U	238U/206Pb	+/-1s	207Pb/206Pb	+/-1s
AU31I7	ok	23.1553	0.638939	0.0036473	0.0254654	0.00149516	0.083757	0.0572593	0.147884	11052.9	2.1838	158.392	593.405	274.175	6.98199	0.0572593	0.00846775
AU31I2	ok	23.4655	0.671331	0.00367461	0.02717	0.00138223	0.100519	0.0525936	0.137389	10249.2	2.27155	140.659	617.694	272.138	7.39398	0.0525936	0.0072258
AU31I5	ok	24.1496	0.395937	0.00376903	0.0154093	0.00118117	0.0321899	0.0498782	0.0907199	9331.62	8.35864	1425.28	1927.42	265.32	4.08839	0.0498782	0.00452494
AU31I6	ok	24.2593	0.574547	0.00379244	0.0220749	0.00148066	0.0790682	0.0511984	0.135056	10459	3.29059	306.579	851.381	263.683	5.82077	0.0511984	0.00691466
AU31I8	ok	24.3588	0.590805	0.00378006	0.0228789	0.00142676	0.0819168	0.0452902	0.144728	11270	2.86761	211.967	742.996	264.546	6.05253	0.0452902	0.00655475
AU31I1	ok	24.6211	0.515885	0.00384393	0.019758	0.00149587	0.078824	0.0501326	0.112512	11268.3	3.76181	243.881	966.279	260.15	5.14005	0.0501326	0.0056405
AU31I9	ok	24.6813	0.704993	0.00386983	0.0268196	0.00134373	0.118168	0.0535381	0.147612	11937.9	1.88789	101.593	511.999	258.41	6.93044	0.0535381	0.00790287
AU31I12	ok	24.7984	0.642274	0.00385002	0.0240593	0.00132793	0.117526	0.0456389	0.170628	11989.9	2.37984	141.167	628.15	259.739	6.24913	0.0456389	0.00778729
AU31I3	ok	24.9905	0.541313	0.00390304	0.0202867	0.00126591	0.0842498	0.0504101	0.121631	10340.9	2.77311	193.119	704.438	256.21	5.19765	0.0504101	0.00613145
AU31I4	old core with young rim	209.224	3.76493	0.0328334	0.0171021	0.00773044	0.0604785	0.0465324	0.106675	12270.9	33.239	208.959	1025.05	30.4568	0.520875	0.0465324	0.00496383
TINA11	Long	166.4922
	Lat (S)	22.22737
analysis number	comments	206Pb/238U age (207corr.)	+/-1s	206Pb/238U	%rsd	208Pb/232Th	%rsd	207Pb/206Pb	%rsd	Hf	Pb	Th	U	238U/206Pb	+/-1s	207Pb/206Pb	+/-1s
MA16B016	ok	23.732	0.354223	0.00370357	0.0147516	0.0014539	0.0384334	0.0497812	0.0378724	11067.5	2.02861	164.632	561.159	270.01	3.98309	0.0497812	0.00188533
MA16B011	ok	23.9675	0.345192	0.00372709	0.0142403	0.00118063	0.0345272	0.0469753	0.0382621	12681.1	3.24333	379.665	924.553	268.306	3.82076	0.0469753	0.00179737
MA16B015	ok	24.0233	0.385103	0.00373445	0.0158379	0.00110137	0.0511816	0.0466933	0.0441107	10887.4	1.54268	112.818	423.328	267.777	4.24103	0.0466933	0.00205967
MA16B014	ok	24.0979	0.275712	0.00374518	0.0113629	0.00133396	0.0273831	0.0457831	0.0237248	11782	7.33335	503.746	2367.68	267.01	3.034	0.0457831	0.0010862
MA16B022	slightly older in middle	24.2485	0.60484	0.00378028	0.0246417	0.00114775	0.0690221	0.0489489	0.0655316	11936.4	2.44979	232.007	636.731	264.531	6.51849	0.0489489	0.0032077
MA16B018	ok	24.2503	0.331562	0.00378796	0.0135383	0.0012499	0.0380983	0.0504877	0.0316598	11509.9	2.4704	183.306	665.385	263.994	3.57404	0.0504877	0.00159843
MA16B010	ok	24.2712	0.333185	0.00379948	0.0135719	0.00134772	0.0423891	0.0521958	0.0326971	10936.8	2.22045	163.19	605.529	263.194	3.57205	0.0521958	0.00170665
MA16B023	common Pb incl in middle	24.3935	0.319411	0.00392176	0.0124291	0.00198241	0.0533111	0.0728379	0.04356	11844.1	4.29183	426.577	1239.45	254.988	3.16926	0.0728379	0.00317282
MA16B024	ok	24.4296	0.346378	0.00379895	0.0140277	0.00131093	0.0488664	0.0469563	0.0367901	11162	2.17048	115.093	578.077	263.231	3.69251	0.0469563	0.00172753
MA16B012	ok	24.4481	0.285432	0.00379977	0.0115682	0.00122311	0.0330964	0.0465269	0.0286173	11196.3	3.57037	325.023	996.288	263.174	3.04446	0.0465269	0.00133148
MA16B021	ok	24.6563	0.365312	0.00383214	0.0147036	0.0013087	0.0387952	0.0447303	0.0301862	11932.8	2.76097	197.191	733.49	260.951	3.83693	0.0447303	0.00135024
MA16B017	ok	24.7001	0.327214	0.00384859	0.0130815	0.0012609	0.0313853	0.0484995	0.0357329	11839.2	3.16833	298.327	901.47	259.836	3.39905	0.0484995	0.00173303
MA16B020	ok	25.0197	0.360735	0.00388954	0.0142975	0.00126057	0.0374133	0.0466927	0.0339146	11294.6	2.62829	222.566	698.339	257.1	3.67589	0.0466927	0.00158356
MA16B019	ok	25.0715	0.409956	0.00390352	0.0162128	0.00133336	0.0423213	0.047891	0.0376795	11483.4	2.2663	212.552	614.789	256.179	4.15338	0.047891	0.00180451
MA16B013	slightly variable Pb/U	25.0929	0.354487	0.00390816	0.0139575	0.00132182	0.0398955	0.0481548	0.0376907	11380.4	2.00512	186.209	537.925	255.875	3.57137	0.0481548	0.00181499
MA16B009	ok	25.2775	0.270305	0.00396366	0.0105938	0.00151023	0.02891	0.0534734	0.0227865	12149.8	6.66696	457.212	2126.99	252.292	2.67274	0.0534734	0.00121847

## Sheet: PlotDat4
Source sheet	Sheet1	138.622	0.0378537	80	0.047613	160.661	0.0468189	11.0342	0.0483704	160.659	0.0446195
Plot name	Concordia1	118.281	0.119765	80	0.047613	142.754	0.0469169	5.51327	0.0261365	160.663	0.0490183
Plot Type	1	121.752	0.0951077	81.5678	0.0475823	128.429	0.0470152	7.31897	0.0306776	128.425	0.0448158
1st free col	13	123.094	0.0584535	83.1979	0.0475517	116.708	0.0471138	3.06732	0.00745616	128.432	0.0492146
Sigma Level	1	118.881	0.0840556	84.894	0.047521	106.941	0.0472127	5.71851	0.0254254	106.936	0.0450133
Absolute Errs	TRUE	123.534	0.0494256	86.6604	0.0474905	98.6764	0.0473119	2.66616	0.00595241	106.946	0.0494121
Symbol Type	2	123.403	0.0499688	88.5013	0.0474599	91.5925	0.0474114	4.61634	0.0130883	91.5856	0.0452121
Inverse Plot	TRUE	118.526	0.0450721	90.4217	0.0474294	85.4532	0.0475112	3.86022	0.010254	91.5994	0.0496108
Color Plot	TRUE	119.135	0.0386389	92.4268	0.0473989	80.0812	0.0476113	3.69199	0.0086952	80.0722	0.045412
3D plot	FALSE	123.362	-0.0197806	94.5223	0.0473684	IsoLine	IsoLine	10.4521	0.049975	80.0903	0.0498106
Linear	FALSE	108.536	0.0797499	96.7145	0.047338			4.78784	0.0173548	IsoLine	IsoLine
Data Range	AM2:AP13	113.689	0.0397247	99.0103	0.0473076			2.62325	0.00466315
Filled Symbols	TRUE	IsoLine	IsoLine	101.417	0.0472772			IsoLine	IsoLine	IsoLine
ConcAge	FALSE			103.943	0.0472469
ConcSwap	FALSE			106.598	0.0472165
1st Symbol-row	1			109.391	0.0471862
				112.333	0.047156
				115.438	0.0471257
				118.718	0.0470955
				122.189	0.0470653
				125.869	0.0470352
				129.775	0.047005
				133.932	0.0469749
				138.362	0.0469449
				143.094	0.0469148
				148.16	0.0468848
				153.596	0.0468548
				159.446	0.0468249
				165.756	0.0467949
				172.586	0.046765
				180	0.0467351
				180	0.0467351
				IsoLine	IsoLine

## Sheet: PlotDat7
Source sheet	Sheet1	124.711	0.0520745	112	0.0471593	133.801	0.0469759	2.52055	0.00493562	133.8	0.0466395
Plot name	Concordia4	124.578	0.0477626	112	0.0471593	131.06	0.0469955	2.23561	0.00496048	133.802	0.0473122
Plot Type	1	124.021	0.0464584	112.638	0.0471529	128.429	0.0470152	1.41766	0.00241078	128.428	0.0466789
1st free col	13	123.615	0.0481883	113.284	0.0471465	125.901	0.0470349	2.06131	0.00462024	128.43	0.0473515
Sigma Level	1	123.916	0.0447281	113.936	0.0471401	123.47	0.0470546	1.69252	0.0034189	123.469	0.0467183
Absolute Errs	TRUE	124.133	0.0406173	114.597	0.0471338	121.131	0.0470743	1.69011	0.00326398	123.471	0.0473909
Symbol Type	2	122.759	0.0435424	115.265	0.0471274	118.879	0.0470941	1.83031	0.00379874	118.877	0.0467577
Inverse Plot	TRUE	121.97	0.0430885	115.941	0.047121	116.708	0.0471138	2.23652	0.00443597	118.88	0.0474304
Color Plot	TRUE	121.358	0.0449979	116.624	0.0471146	114.615	0.0471336	1.91019	0.00284402	114.614	0.0467972
3D plot	FALSE	121.29	0.0442458	117.316	0.0471082	112.596	0.0471533	1.29916	0.00245202	114.617	0.0474699
Linear	FALSE	120.259	0.0444268	118.016	0.0471018	IsoLine	IsoLine	1.99542	0.00390397	IsoLine	IsoLine
Data Range	AM16:AP27	119.809	0.0462794	118.725	0.0470954			1.1584	0.00226043
Filled Symbols	TRUE	IsoLine	IsoLine	119.442	0.0470891			IsoLine	IsoLine	IsoLine
ConcAge	FALSE			120.167	0.0470827
ConcSwap	FALSE			120.902	0.0470763
1st Symbol-row	1			121.645	0.0470699
				122.398	0.0470636
				123.16	0.0470572
				123.931	0.0470508
				124.712	0.0470445
				125.503	0.0470381
				126.304	0.0470317
				127.116	0.0470253
				127.937	0.047019
				128.77	0.0470126
				129.613	0.0470063
				130.467	0.0469999
				131.333	0.0469935
				132.21	0.0469872
				133.099	0.0469808
				134	0.0469745
				134	0.0469745
				IsoLine	IsoLine

## Sheet: PlotDat11
Source sheet	Sheet1	122.543	0.0473064	116	0.0471204	128.429	0.0470152	1.04359	0.00174596	125.9	0.0468668
Plot name	Concordia8	122.082	0.0440226	116	0.0471204	127.152	0.0470251	0.764522	0.00124539	125.901	0.0472031
Plot Type	1	121.909	0.0450019	116.318	0.0471174	125.901	0.0470349	0.813639	0.00155921	123.47	0.0468865
1st free col	13	121.936	0.04452	116.639	0.0471145	124.674	0.0470448	0.839406	0.00148513	123.471	0.0472228
Sigma Level	1	122.244	0.0419762	116.961	0.0471115	123.47	0.0470546	1.01773	0.00145808	121.131	0.0469062
Absolute Errs	TRUE	121.351	0.0446393	117.284	0.0471085	122.29	0.0470645	1.09597	0.00170421	121.132	0.0472425
Symbol Type	2	120.825	0.0461611	117.61	0.0471055	121.131	0.0470743	0.974896	0.00171524	118.878	0.0469259
Inverse Plot	TRUE	120.685	0.0462033	117.937	0.0471025	119.994	0.0470842	0.894311	0.00118222	118.879	0.0472622
Color Plot	TRUE	120.162	0.0466003	118.266	0.0470996	118.879	0.0470941	1.11168	0.00178035	116.708	0.0469457
3D plot	FALSE	120.229	0.0456767	118.597	0.0470966	117.784	0.0471039	0.69569	0.00117462	116.709	0.047282
Linear	FALSE	119.976	0.0456296	118.93	0.0470936	116.708	0.0471138	0.804573	0.00144077	IsoLine	IsoLine
Data Range	AM30:AP41	119.711	0.0460286	119.265	0.0470906	IsoLine	IsoLine	0.65297	0.00108388
Filled Symbols	TRUE	IsoLine	IsoLine	119.601	0.0470877			IsoLine	IsoLine	IsoLine
ConcAge	FALSE			119.94	0.0470847
ConcSwap	FALSE			120.28	0.0470817
1st Symbol-row	1			120.622	0.0470787
				120.967	0.0470758
				121.313	0.0470728
				121.661	0.0470698
				122.011	0.0470668
				122.363	0.0470639
				122.718	0.0470609
				123.074	0.0470579
				123.432	0.0470549
				123.793	0.047052
				124.155	0.047049
				124.52	0.047046
				124.887	0.047043
				125.256	0.0470401
				125.627	0.0470371
				126	0.0470341
				126	0.0470341
				IsoLine	IsoLine
